# Supplementary material for: CNS bridging radiotherapy achieves rapid cytoreduction before CAR T-cell therapy for aggressive B-cell lymphomas
Source: PubMed Central journal article supplement — Blood Adv. 2024 Jun 13;8(19):5192–9. doi: 10.1182/bloodadvances.2024013393 (PMC11530392; doi:10.1182/bloodadvances.2024013393), 2024-06-13

**Supplementary Figure 1: Association of CNS tumor size with neurotoxicity.** Comparison of CNS tumor size, calculated as sum of product diameters, for patients who experienced high grade ICANS compared with those who did not. **(A)** At baseline, prior to CNS BRT, the mean tumor size in patients who experienced high grade ICANS compared with those who did not was 18.3 cm<sup>2</sup> (-8.2 to 44.7) versus 7.3 cm<sup>2</sup> (1.0 to 13.6) (p = 0.08). **(B)** After CNS-BRT, prior to CAR T infusion, the mean tumor size in patients who experienced high grade ICANS compared with those who did not was 2.92 cm<sup>2</sup> (-9.8 to 15.6) versus 1.6 cm<sup>2</sup> (0.12 to 3.0) (p = 0.28). The scale of the Y-axes in panels A and B is different.

# Supplementary Figure 1

**A**

**CNS Tumor Size at Baseline**

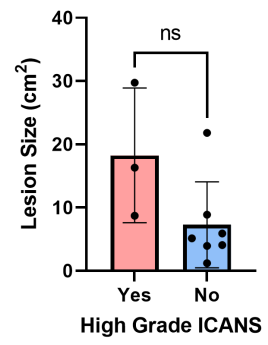

**B**

**CNS Tumor Size Post CNS-BRT**

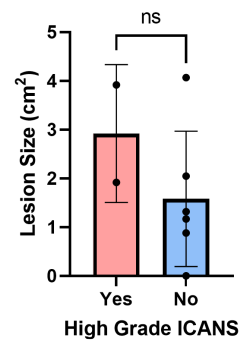

Supplement: BLOODA_ADV-2024-013393-mmc1.pdf [file BLOODA_ADV-2024-013393-mmc1.pdf]
